# Supplementary material
Source: publisher figshare collection journal article supplement (https://gsajournals.figshare.com/ndownloader/files/15604193)
Supplement: Supplementary file 1 [file 15604193]

## Sheet: GO Slim 217 MAT Top Hits
Table S4. GO Slim Mapper results for the 217 identified genes in the MAT locus screen
GO Slim Cellular Component 217 MAT Top Hits
GOID	GO term	p-value Fisher's	B-H Critical Value	Genes Annotated to Term
5575	cellular component unknown	0.01834	0.00217391	YAL067W-A,KIN3,YBR144C,YDR029W,RKM2,YDR509W,YER087C-A,COM2,YER135C,SNO3,YGL218W,YGR201C,YHI9,YIL025C,YIL032C,YJL009W,YJL120W,YKR073C,YLR342W-A,YLR374C,YML094C-A,YMR105W-A,YMR119W-A,YMR122C,YMR153C-A,YNL146C-A,BSC5,YOL134C,YOR072W,MUM3,YOR364W,YPL080C,YPL088W
5815	microtubule organizing center	0.03558	0.00434783	HSL7,MPS1,TUB1,NDJ1,SGO1,KIN4
GO Slim Molecular Function 217 MAT Top Hits
GOID	GO term	p-value Fisher's	B-H critical value	Genes Annotated to Term
3674	molecular function unknown	0.0004997	0.00113636	YAL067W-A,YBR096W,VID24,IML3,YBR137W,YBR144C,APD1,UBS1,HSM3,LDB16,MRC1,BPH1,RMD1,QRI7,RGT2,YDL211C,YDR029W,MRH1,SSY1,UBX5,ECM11,YDR509W,EMI2,GRH1,ZRG8,YER087C-A,TMN3,DSE1,YER135C,BCK2,YER181C,PUG1,SNO3,YGL218W,MTC3,SHE10,NNF2,YGR201C,YHI9,MTC6,AIM18,YIL025C,YIL032C,MMF1,YIL060W,SPO22,AIM19,ICE2,CSM2,SYS1,YJL009W,PRY3,PRM10,YJL120W,SPC1,HIT1,AIM24,ILM1,YKL018C-A,TTI1,FAT3,YKR073C,EMC6,PER33,YLR342…
51082	unfolded protein binding	0.008912	0.00227273	SSA1,SYO1,CCT2,CCT8,CCT7,CPR7,YDJ1
GO Slim Biological Process 217 MAT Top Hits
GOID	GO term	p-value Fisher's	B-H critical value	Genes Annotated to Term
7059	chromosome segregation	0.0004605	0.00049505	KIN3,IML3,MRC1,MPS1,SPC19,SMC1,KIP3,SPO22,STH1,CSM2,HSK3,CTF3,TUB1,NDJ1,SGO1,KIN4,GPN2
8150	biological process unknown	0.003811	0.000990099	YAL067W-A,YBR096W,BMT2,YBR144C,APD1,CPR4,RMD1,YDL211C,YDR029W,MRH1,YDR509W,YER087C-A,COM2,YER135C,YER181C,YGL218W,MTC3,NNF2,YGR201C,MTC6,AIM18,YIL025C,YIL032C,YIL060W,AIM19,YJL009W,PRM10,YJL120W,YKL018C-A,TTI1,YKR073C,YKR078W,PER33,YLR278C,YLR342W-A,YLR374C,YML037C,YML094C-A,YMR105W-A,YMR119W-A,YMR122C,YMR153C-A,YNL146C-A,YNL146W,VID27,RTC4,BSC5,YOL134C,YOR072W,AIM41,YOR364W,FRE5,YPL080C,YPR097W
6457	protein folding	0.004543	0.00148515	SSA1,SSE2,TSA2,CCT2,CCT8,CCT7,CPR7,EMC6,YDJ1
51726	regulation of cell cycle	0.00521	0.0019802	HSL7,CKS1,MRC1,MPS1,SPC19,RSC3,BCK2,KIP3,PCL7,SPO22,HSK3,CTF3,NDJ1,SGO1,KIN4,OPY2
6605	protein targeting	0.007412	0.00247525	SSA1,VID24,YBR137W,SYO1,COG3,MSP1,WSC4,TOM71,ICE2,SYS1,ATG27,SPC1,NUP120,SPC3,VPS9,YDJ1,RAS2,TOM6,GPN2
48285	organelle fission	0.01305	0.0029703	IML3,MRC1,MPS1,MSH6,NUM1,ECM11,SMC1,KIP3,SPO22,STH1,CSM2,CTF3,TUB1,NDJ1,PAP2,SGO1,KIN4,GPN2
51321	meiotic cell cycle	0.01412	0.00346535	IML3,MSH6,ECM11,EMI2,SHE10,GSC2,SPO22,STH1,CSM2,ADE16,GAS2,TUB1,RAS2,NDJ1,PAP2,SGO1,MUM3
51604	protein maturation	0.02997	0.0039604	MAP2,SPC1,SPC3,PSD1,KEX2
5975	carbohydrate metabolic process	0.03504	0.00445545	GAL7,VID24,YPR1,SNF1,PCL6,FLO8,SAK1,GSC2,PCL7,GPP1,EXG1,YIG1
278	mitotic cell cycle	0.04054	0.0049505	IML3,HSL7,CKS1,MRC1,MPS1,PAC11,BCK2,SMC1,KIP3,MET30,STH1,CTF3,TUB1,SGO1,KIN4,GPN2,OPY2
51169	nuclear transport	0.04184	0.00544554	SSA1,UBS1,SYO1,RLI1,RPS26B,ICE2,IST3,NUP120,HRB1,YDJ1,GPN2
1403	invasive growth in response to glucose limitation	0.04788	0.00594059	SNF1,FLO8,TMN3,DSE1,SIP2
GO Slim Macromolecular Component 217 MAT Top Hits
GOID	GO term	p-value Fisher's	B-H Critical Value	Gene(s)
5832	chaperonin-containing T-complex	0.0003448	0.00010661	SSA1,CCT2,CCT8,CCT7
32301	MutSalpha complex	0.003323	0.00021322	MSH6,NHP6A
5787	signal peptidase complex	0.006498	0.000319829	SPC1,SPC3
942	condensed nuclear chromosome outer kinetochore	0.006646	0.000426439	IML3,SPC19,HSK3
775	chromosome, centromeric region	0.008732	0.000533049	IML3,SLX5,MPS1,SPC19,SLD3,HSK3,CTF3,SGO1
778	condensed nuclear chromosome kinetochore	0.009195	0.000639659	IML3,MPS1,SPC19,HSK3,CTF3,SGO1
31588	nucleotide-activated protein kinase complex	0.01059	0.000746269	SNF1,SIP2
780	condensed nuclear chromosome, centromeric region	0.01509	0.000852878	IML3,MPS1,SPC19,HSK3,CTF3,SGO1
72380	TRC complex	0.01553	0.000959488	YBR137W,YDJ1
5880	nuclear microtubule	0.02127	0.0010661	KIP3,TUB1
776	kinetochore	0.02646	0.00117271	IML3,MPS1,SPC19,HSK3,CTF3,SGO1
307	cyclin-dependent protein kinase holoenzyme complex	0.02825	0.00127932	CKS1,PCL6,PCL7
5827	polar microtubule	0.03373	0.00138593	TUB1
5816	spindle pole body	0.03588	0.00149254	HSL7,MPS1,TUB1,NDJ1,SGO1,KIN4
42729	DASH complex	0.04264	0.00159915	SPC19,HSK3
5881	cytoplasmic microtubule	0.04548	0.00170576	PAC11,KIP3,TUB1
17054	negative cofactor 2 complex	0.06633	0.00181237	BUR6
33768	SUMO-targeted ubiquitin ligase complex	0.06633	0.00191898	SLX5
43224	nuclear SCF ubiquitin ligase complex	0.06633	0.00202559	MET30
148	1,3-beta-D-glucan synthase complex	0.09784	0.0021322	GSC2
45298	tubulin complex	0.09784	0.00223881	TUB1
70274	RES complex	0.09784	0.00234542	IST3
71021	U2-type post-spliceosomal complex	0.09784	0.00245203	PRP18
Table S4. GO Slim Mapper results for the 217 identified genes in the MAT locus screen SGD GO Slim Mapper results for Cellular Component, Molecular Function, Biological Process, and Macromolecular Complex reported with Benjamini-Hochberg critical values for multiple comparison correction.
